# Supplementary material
Source: PubMed Central journal article supplement (PMC6289724)
Supplement: NIHMS1512042-supplement-1.pdf [file NIHMS1512042-supplement-1.pdf]

## **Supplementary Information**

**RNA-mediated dimerization of the human deoxycytidine deaminase APOBEC3H  
influences enzyme activity and interaction with nucleic acids**

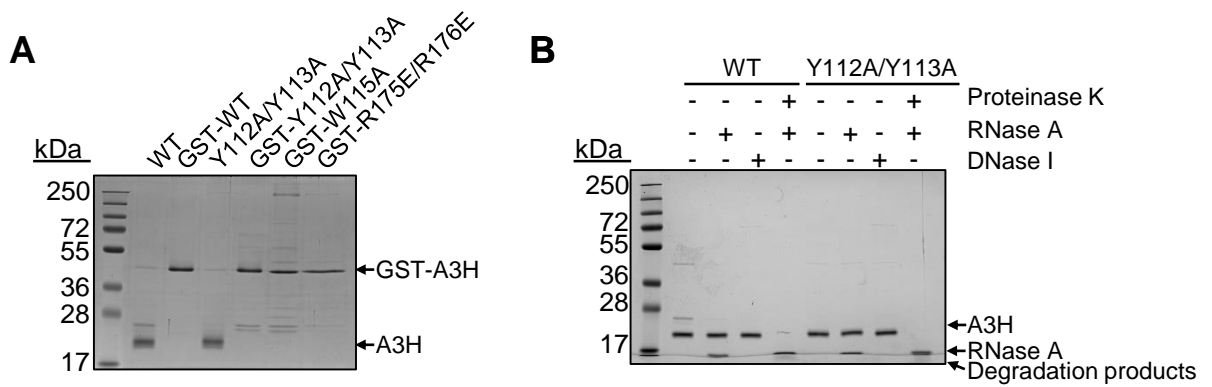

**Supplementary Figure S1.** SDS-PAGE of purified A3H enzymes used in Figure 1. (A) Coomassie stained gel demonstrating presence of proteins for the SYBR Gold stained gel shown in Figure 1A. (B) Coomassie stained gel demonstrating presence of proteins and Proteinase K digestion of proteins for the SYBR Gold stained gel shown in Figure 1B.

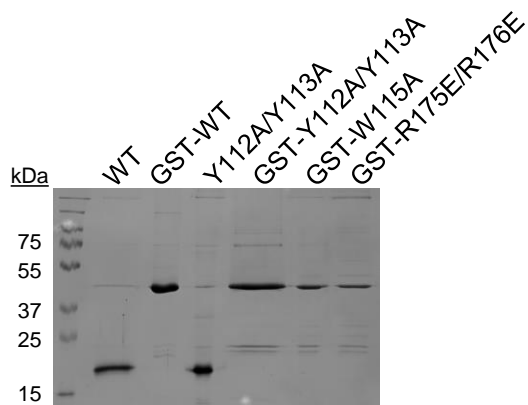

**Supplementary Figure S2.** SDS-PAGE of purified A3H enzymes. A3H enzymes were purified as detailed in the Materials and Methods and resolved on a SDS-PAGE gel to estimate purity.
